# Supplementary material
Source: PubMed Central journal article supplement (PMC6338855)
Supplement: pnas.1813582116.sapp.pdf [file pnas.1813582116.sapp.pdf]

## Supplementary Information for

### **Human RIPK1 Deficiency Causes Combined Immunodeficiency and Inflammatory Bowel Diseases**

Yue Li,<sup>1\*</sup> Marita Führer,<sup>2\*</sup> Ehsan Bahrami,<sup>1\*</sup> Piotr Socha,<sup>3</sup> Maja Klaudel-Dreszler,<sup>3</sup> Amira Bouzidi,<sup>1</sup> Yanshan Liu,<sup>1</sup> Anna Lehle,<sup>1</sup> Thomas Magg,<sup>1</sup> Sebastian Hollizeck,<sup>1</sup> Meino Rohlfes,<sup>1</sup> Raffaele Conca,<sup>1</sup> Michael Field,<sup>4</sup> Neil Warner,<sup>5</sup> Slae Mordechai,<sup>6</sup> Eyal Shteyer,<sup>7</sup> Dan Turner,<sup>7,22</sup> Rachida Boukari,<sup>8</sup> Reda Belbouab,<sup>8</sup> Christoph Walz,<sup>9</sup> Moritz M. Gaidt<sup>10</sup>, Veit Hornung,<sup>10</sup> Bernd Baumann,<sup>11</sup> Ulrich Pannicke,<sup>2</sup> Eman Al Idrissi,<sup>12</sup> Hamza Ali Alghamdi,<sup>12</sup> Fernando Sepulveda,<sup>13</sup> Marine Gil,<sup>13</sup> Geneviève de Saint Basile,<sup>13,14</sup> Manfred Hönig,<sup>15</sup> Sibylle Koletzko,<sup>1,21</sup> Aleixo M. Muise,<sup>5,16,17,21</sup> Scott B. Snapper,<sup>4,18,19,21</sup> Klaus Schwarz<sup>2,20#</sup>, Christoph Klein,<sup>1,21#</sup> and Daniel Kotlarz<sup>1,21#</sup>.

\*To whom correspondence should be addressed:

Daniel Kotlarz, MD, PhD

Dr. von Hauner Children's Hospital, Department of Pediatrics,

University Hospital LMU Munich

Lindwurmstrasse 4

D-80337 Munich, Germany

E-mail: daniel.kotlarz@med.uni-muenchen.de

#### **This PDF file includes:**

Supplementary text

Figs. S1 to S2

Tables S1 to S7

References for SI reference citations

## **Supplementary Information Text**

### **Materials and Methods**

#### **DNA sequencing**

Patients' and family members' peripheral blood was used to isolate genomic DNA using QIAamp DNA Blood Mini Kit (Qiagen) according to manufacturer's instructions. Upon enrichment for exons using Agilent Exome enrichment or Ampliseq exome panel, whole exome sequencing was conducted on Illumina sequencing platforms. Bioinformatics analysis for detection of rare sequence variants following Mendelian inheritance patterns were performed as described previously (1, 2). PCR amplification of mutated DNA regions was conducted using primers described in the *SI Appendix*, Table S4. Sanger sequencing was performed by Eurofins Genomics (MWG Eurofins) or ABI PRISM Terminator v1.1 Cycle Sequencing Kit (ABI). Sequences were aligned and analyzed by custom alignment software.

#### **Cell culture**

Epstein-Barr Virus-transformed lymphoblastoid cell lines (EBV-LCL) from healthy donors and patients as well as RIPK1-deficient Jurkat cells (kindly provided by Dr. B. Seed) and BLaER1 cells were cultured in RPMI-1640 medium supplemented with GlutamAX™ (Thermo Fisher Scientific), 10% v/v fetal bovine serum (FBS), 1% penicillin-streptomycin, 1 mM Sodium Pyruvate, and 10 mM HEPES (all from Gibco, Life Technologies).

HT-29 (ATCC, HTB-38), HCT-116 (ATCC, CCL247), and patient-derived dermal fibroblasts were maintained in DMEM (Thermo Fisher Scientific) supplemented with 1%

L-glutamine, 10% v/v FBS, and 1% penicillin penicillin/streptomycin. All cells were routinely tested for Mycoplasma contamination.

To differentiate BLaER1 cells into monocytes, 80,000 cells per well were cultured in RPMI-1640 medium supplemented with recombinant human IL-3 (10 ng/ml), recombinant human M-CSF (10 ng/ml, both from PeproTech), and  $\beta$ -Estradiol (100 nM, Sigma-Aldrich) for 6 days based on published protocol (3).

### **Engineering of RIPK1 knockout cell lines using CRISPR/Cas9 genome editing**

Two sgRNAs targeting the 5'- and 3'- end of RIPK1 were designed with the online CRISPR Design tool developed by the Feng Zhang's lab. Two targets with low off-target rates were chosen (*SI Appendix*, Table S4). sgRNAs were subcloned into pSpCas9(BB)-2A-GFP vector (PX458, PX459) (Addgene). Plasmids were transfected into HT-29 and HCT-116 cell lines by lipofectamine 2000 (Thermo Fisher Scientific) according to manufacturer's protocols. Single cells were sorted in 96-wells 48 h after transfection. RIPK1 KO in expanded clones was confirmed by Sanger sequencing and Western blot analysis.

### **Cloning and lentiviral overexpression of RIPK1 mutants**

Human wt *RIPK1* was amplified from the verified cDNA sequence clone purchased from Dharmacon GE Healthcare (Accession: BC126254, Clone ID: 8991970) and cloned into the bicistronic pET-IRES-RFP plasmid. PCR-based site-directed mutagenesis has been used to generate patient-specific mutants. For constructing the "all-in-one" Tetracycline-inducible expression system, tetracycline operator and repressor were amplified from

pcDNA4/TO-Flag-H3.3 (a gift from Bing Zhu; Addgene, #47980) and pcDNA6/TR, respectively, and cloned into the pET-IRES-RFP vectors.

Lentiviral packaging plasmids psPAX2 and pMD2.G (kindly provided by Didier Trono, Addgene, #12260 and #12259) were cotransfected with the lentiviral vector encoding RIPK1 into HEK293T cells in 10 cm petri-dishes at 70% confluency. The supernatants containing viral particles were collected every 24 hours for a period of 72 hours. Subsequently, RIPK1-deficient BLaER1, Jurkat, HT-29, and HCT-116 cells were transduced with lentiviral particles as described previously (1). Transduced cells were sorted by RFP mean fluorescence intensity using the BD FACSAria cell sorter (BD Bioscience).

### **Immunophenotyping of peripheral blood mononuclear cells**

Patients' blood samples were washed with PBS (Gibco) and stained with antibodies (*SI Appendix*, Table S5) in BD Brilliant stain buffer (BD Biosciences). Except for chemokine receptors that were incubated at 37 °C, surface antigens were incubated at room temperature for 15 min. 1x BD FACS™ Lysing solution (BD Biosciences) was used to remove red blood cells. Sample acquisition was performed on the LSRFortessa™ flow cytometer (BD Biosciences) and data were analyzed using Flowjo V9 (TreeStar).

### **T cell proliferation and activation**

PBMCs isolated from healthy controls, patients, and family members were labeled with carboxyfluorescein diacetate succinimidyl ester (CFSE, Thermo Fisher Scientific, 2.5μM) and co-cultured with Biotin-anti-CD3 (Thermo Fisher Scientific) coupled to anti-Biotin

MACSiBeads (Milteni Biotec) with or without soluble anti-CD28 (Thermo Fisher Scientific, 1 $\mu$ g/ml) or with phorbol 12-myristate 13-acetate (PMA, 0.5 ng/ml) and ionomycin (Sigma-Aldrich, 1 $\mu$ M). Activated CD3<sup>+</sup>CD4<sup>+</sup> and CD3<sup>+</sup>CD8<sup>+</sup> T cells were analyzed based on CD25 and CD69 expression by BD CANTOII flow cytometer (BD Biosciences) after two days. To analyze T cell proliferative responses CFSE dilution assays were assessed after 4-6 days.

### **Immunoblotting, ELISA, and cytotoxicity**

To analyze the expression of RIPK1 in EBV-LCL and primary fibroblasts, the NF- $\kappa$ B signaling in Jurkat cells upon TNF- $\alpha$  (50 ng/ml, Peprotech) stimulation, as well as IL-1 $\beta$  production and secretion in cell lysates and supernatants of BLaER1 cells upon treatment with LPS (200 ng/ml, 12 hours, Sigma-Aldrich)  $\pm$  Nigericin (6.5  $\mu$ M, 2 hours, Sigma-Aldrich), immunoblotting was performed following standard procedures. Cells were lysed in 1x cell lysis buffer (Cell Signaling) and protein concentrations were normalized using Bradford quantification. Equal amounts of cell lysates were then subjected to SDS-PAGE. To detect MLKL oligomerization in HT-29 cells stimulated with TNF- $\alpha$  (100 ng/ml, PeproTech)  $\pm$  BV6 (100  $\mu$ M, kindly provided by Genentech)  $\pm$  Z-VAD-FMK (20  $\mu$ M, Enzo Life Sciences) the samples were boiled under non-reducing conditions. Proteins were transferred onto polyvinylidene difluoride (PVDF) membranes, followed by blocking in 5% skimmed milk. Primary and HRP-conjugated secondary antibodies are listed in *SI Appendix*, Table S6. Chemiluminescence signals were detected using the ChemiDoc<sup>TM</sup> XRS+ System (Bio-Rad) and analyzed with ImageLab<sup>TM</sup> software (Bio-Rad).

To quantify IL-1 $\beta$  secretion of BLaER1 cells upon inflammasome activation with LPS (20

ng/ml, 3 hours)  $\pm$  Nigericin (6.5  $\mu$ M, 1 hour)  $\pm$  small molecule inhibitors for NLPR3 (MCC950, 5  $\mu$ M) and MLKL (NSA, 2  $\mu$ M, 2 hours before LPS priming), supernatants were collected and measured using the Human IL-1 $\beta$ /IL-1F2 DuoSet ELISA Kit (DY201, R&D Systems) and a Synergy H1 microplate reader (BioTek Instruments). Cytotoxicity was quantified by lactate dehydrogenase (LDH) release using the CytoTox96<sup>®</sup> nonradioactive cytotoxicity assay kit (G1780, Promega) according to the manufacturer's instructions.

### **Electrophoretic mobility shift assay**

For electromobility shift assays (EMSA), RIPK1 cDNA sequences were ligated into the pcDNATM6/myc-His A (Invitrogen) expression plasmid to reconstitute RIPK1<sup>-/-</sup> Jurkat cells with RIPK1 wt and the RIPK1 variant Y426\*. Jurkat cells were electroporated using the Amaxa<sup>®</sup> Cell Line Nucleofector<sup>®</sup> Kit V (Lonza) using 5.5  $\mu$ g *RIPK1* plasmid. Cells with stable transcripts were positively selected using RPMI 1640 (1x) + L-glutamine + 25 mM HEPES (Gibco) supplemented with 10% FBS (PAA) and 5  $\mu$ g/ml Blasticidin (Sigma-Aldrich) as selection medium. Jurkat cells and patient's fibroblasts were stimulated with TNF- $\alpha$  (ImmunoTools; 50 ng/ml) for 30 min. Protein extraction and EMSAs were performed as previously described (4).

### **Confocal immunofluorescence microscopy**

Dermal fibroblasts were seeded onto glass coverslips and fixed with 3.7% paraformaldehyde (Santa Cruz) for 15 minutes at room temperature. Cells were permeabilized by incubation with 0.5% Nonidet P40 (Sigma-Aldrich) at room temperature,

followed by blocking in 3% bovine serum albumin for 20 minutes. RIPK1 was stained by anti-RIPK1 antibody (Cell signaling) for 90 minutes followed by the secondary antibody staining for 45 minutes (*SI Appendix*, Table S7). Actin filaments and nuclei were stained by Alexa Fluor® 594 Phalloidin (Thermo Fisher Scientific) and 4,6 diamidino-2-phenylindole (DAPI; Sigma-Aldrich). Cells were mounted by fluorescent mounting medium (Dako) and visualized using Leica TCS SP5 confocal microscope (Leica). Images were analyzed by Leica LAS AF Lite and ImageJ software.

### **Dual-luciferase reporter assay**

To determine NF- $\kappa$ B activity HCT-116 cells were co-transfected with 300 ng p55-A2-Luc luciferase reporter plasmids containing the NF- $\kappa$ B binding sites and 15 ng pTK-Green Renilla plasmids as an internal control. After 24 hours of incubation, cells were treated with 10 ng/ml TNF- $\alpha$  (Peprotech) for the indicated time points. Cells were then lysed in 1x passive lysis buffer and firefly and renilla luciferase activities were determined according to the protocol of the Dual Luciferase Assay Kit (Biotium) using a Synergy H1 microplate reader (BioTek Instruments).

### **Analysis of cell death in HT-29 coloncarcinoma cell lines**

HT-29 cells were seeded in 48-well plates and cultured in complete DMEM media for 12 h. Cell death was induced by treatment with TNF- $\alpha$  (100 ng/ml, PeproTech)  $\pm$  BV6 (100  $\mu$ M, kindly provided by Genentech)  $\pm$  Z-VAD-FMK (20  $\mu$ M, Enzo Life Sciences). Treated cells were collected at indicated time points, stained with Annexin V and DAPI (Thermo Fisher Scientific), and subjected to flow cytometry analyses. To screen for cell death responses in

Jurkat cells, Annexin V and DAPI staining or sub-G1 fractions stained with DAPI staining buffer containing 0.25% Triton X100 (Sigma-Aldrich) have been analyzed by flow cytometry.

### **Statistics**

Statistical analyses were performed using GraphPad Prism 6 (GraphPad Software). No method of randomization or blinding was used. No samples were excluded from analysis. Two-tailed unpaired t-test or One-way ANOVA with Dunnett's correction were performed. Graphic data were indicated as mean  $\pm$  SD. *P* values  $< 0.05$  were considered as statistically significant.

### **Data availability**

The identified *RIPK1* mutations of our patients will be submitted to the ClinVar database (<https://www.ncbi.nlm.nih.gov/clinvar/>) upon publication. Information on the raw whole-exome sequencing data will not be published to protect research participant privacy.

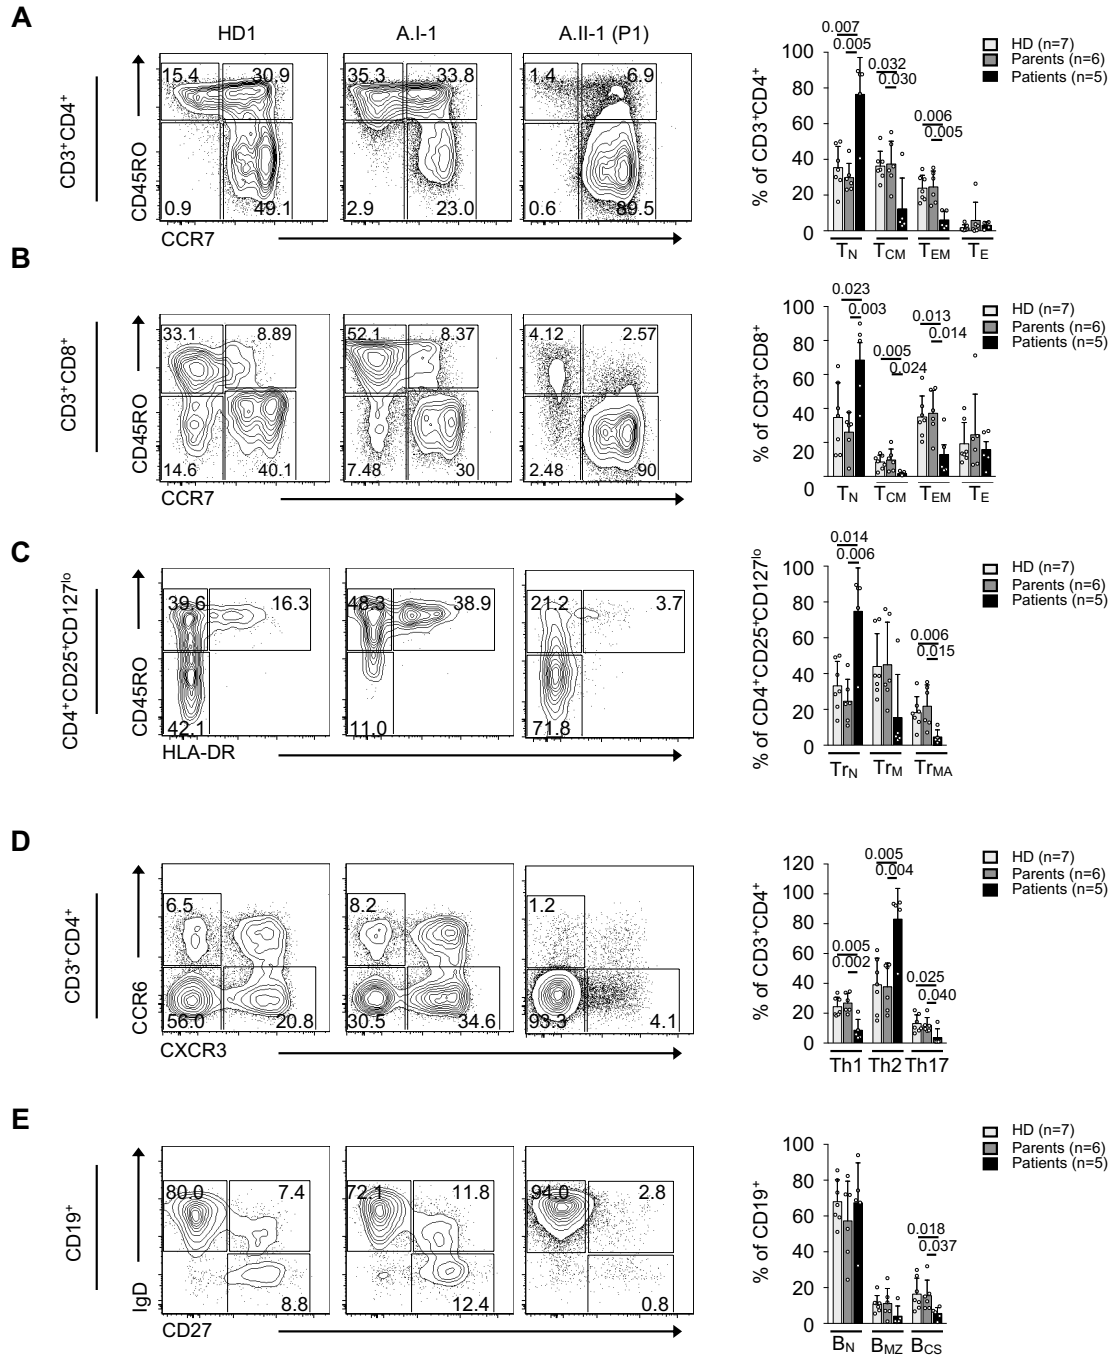

**Fig. S1. RIPK1 deficiency is associated with lymphocyte dysfunction.**

(A-E) Representative immunophenotypic analysis of naïve (T<sub>N</sub>), central memory (T<sub>CM</sub>), effector memory (T<sub>EM</sub>), and effector (T<sub>E</sub>) CD4<sup>+</sup> (A) and CD8<sup>+</sup> (B) T cells (based on CD45RO and CCR7 expression, CD127<sup>lo</sup>CD25<sup>+</sup> naïve (T<sub>RN</sub>), memory (T<sub>RM</sub>) and activated memory (T<sub>MA</sub>) Treg cells (C), CXCR3<sup>+</sup>CCR6<sup>-</sup> Th1 and CXCR3<sup>-</sup>CCR6<sup>+</sup> Th17 (D), as well

as IgD<sup>+</sup>CD27<sup>-</sup> naïve (B<sub>N</sub>), IgD<sup>+</sup>CD27<sup>+</sup> marginal zone (B<sub>MZ</sub>), and IgD<sup>-</sup>CD27<sup>+</sup> switched memory (B<sub>SM</sub>) B cells (**E**) in PBMC from P1 (left panel). Graphical representations of the immunphenotypical analysis of P1, P5, P6, P7, and P8 showing the mean  $\pm$  SD of indicated cell populations (right panel). HD, light grey; parents, dark grey; patients, black. Exact *p* values are shown.

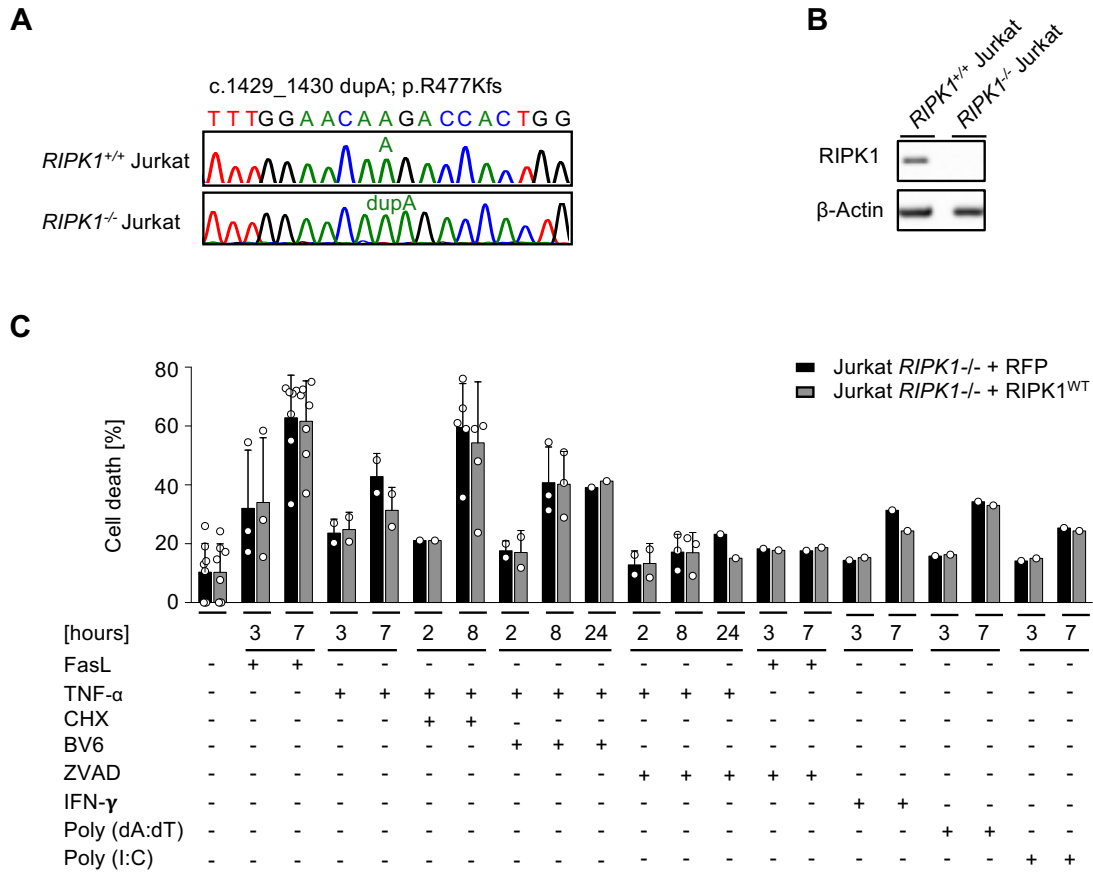

**Fig. S2. Assessment of cell death responses in RIPK1-deficient Jurkat cells.**

(A) DNA Sanger sequencing confirmed a biallelic insertion mutation (c.1429\_1430 dupA; p.R477Kfs) and (B) immunoblotting showed abrogated protein expression of RIPK1 in previously reported RIPK1-deficient Jurkat cells(5). (C) Flow cytometry revealed no difference in cell death (Annexin V<sup>+</sup> cells) between RIPK1-deficient Jurkat cells overexpressing either RFP or wt RIPK1 after stimulation with the following agents: Fas Ligand (50 ng/ml), TNF-α (10 ng/ml) ± CHX (250 ng/ml) ± BV6 (100 μM) ± Z-VAD-FMK (20 μM), Fas Ligand (50 ng/ml) ± CHX (250 ng/ml), Interferon γ (100 ng/ml), poly (dA:dT) (10 μg/ml), poly (I:C) (100 μg/ml); Dots indicate the number of experiments.

**Table S1. Demographic, genetic, and clinical data of RIPK1-deficient patients**

| Patients                               | P1                                                                              | P2                                                                      | P3                                                             | P4                                                  | P5                                                                  | P6                                        | P7                         | P8                         |
|----------------------------------------|---------------------------------------------------------------------------------|-------------------------------------------------------------------------|----------------------------------------------------------------|-----------------------------------------------------|---------------------------------------------------------------------|-------------------------------------------|----------------------------|----------------------------|
| <b>Demographics and Genetics</b>       |                                                                                 |                                                                         |                                                                |                                                     |                                                                     |                                           |                            |                            |
| <b>Mutation</b>                        | c.1844T>C,p.1615T                                                               | c.1934C>T,p.T645                                                        | c.1278C>A,p.Y426*                                              | c.954delG,p.M318fs                                  | c.1934C>T,p.T645M                                                   | c.1802G>A,p.C601Y                         | c.1802G>A,p.C601Y          | c.1802G>A,p.C601Y          |
| <b>Consanguinity</b>                   | not reported                                                                    | yes                                                                     | yes                                                            | yes                                                 | yes                                                                 | yes                                       | yes                        | yes                        |
| <b>Ethnicity/<br/>Country</b>          | Caucasian /<br>Poland                                                           | Arab /<br>Kuwait                                                        | Caucasian /<br>Germany                                         | Arab /<br>Saudi Arabia                              | Arab /<br>Israel                                                    | North African /<br>Algeria                | North African /<br>Algeria | North African /<br>Algeria |
| <b>Sex</b>                             | male                                                                            | female                                                                  | female                                                         | female                                              | female                                                              | male                                      | female                     | female                     |
| <b>Age of onset/<br/>diagnosis</b>     | 6mo/<br>3y6mo                                                                   | 1mo/<br>3y1mo                                                           | 1d/<br>post mortem                                             | 1d/<br>post mortem                                  | 1d/<br>6y10mo                                                       | 6mo/<br>10y6mo                            | 20d/<br>5y5mo              | 3mo /<br>3y                |
| <b>Clinical presentation</b>           |                                                                                 |                                                                         |                                                                |                                                     |                                                                     |                                           |                            |                            |
| <b>Gastrointestinal manifestations</b> |                                                                                 |                                                                         |                                                                |                                                     |                                                                     |                                           |                            |                            |
| <b>Colitis</b>                         | pancolitis                                                                      | not reported                                                            | colitis                                                        | colitis                                             | left-sided colitis                                                  | left-sided colitis                        | left-sided colitis         | left-sided colitis         |
| <b>Growth failure</b>                  | +                                                                               | +                                                                       | +                                                              | +                                                   | +                                                                   | +                                         | +                          | +                          |
| <b>Abdominal pain</b>                  | +                                                                               | -                                                                       | +                                                              | +                                                   | +                                                                   | +                                         | +                          | +                          |
| <b>Diarrhea</b>                        | mucous, bloody                                                                  | mucous, bloody                                                          | bloody                                                         | non-bloody                                          | mucous, bloody                                                      | non-bloody                                | non-bloody                 | non-bloody                 |
| <b>Oral lesions</b>                    | aphthous lesions                                                                | -                                                                       | -                                                              | -                                                   | ulcers                                                              | gingivostomatitis                         | aphthous lesions           | aphthous lesions           |
| <b>Perianal disease</b>                | +                                                                               | +                                                                       | -                                                              | +                                                   | +                                                                   | +                                         | +                          | +                          |
| <b>Others</b>                          | esophagitis, gastritis<br>with erosions/ulcers,<br>duodenitis with<br>polyps    |                                                                         | GI infections<br>(rotavirus/adenovirus)                        | esophagitis, gastritis                              |                                                                     | -                                         | -                          | -                          |
| <b>Extraintestinal Manifestations</b>  |                                                                                 |                                                                         |                                                                |                                                     |                                                                     |                                           |                            |                            |
| <b>Recurrent infections</b>            | conjunctivitis,<br>pneumonia, deep-<br>seated infections,<br>episodes of sepsis | otitis media,<br>recurrent URI, LRI,<br>and sinopulmonary<br>infections | septicemia, upper and<br>lower respiratory tract<br>infections | bacteremia, sepsis,<br>skin abscesses, UTI          | CMV-associated<br>esophagitis, otitis<br>media, pneumonia,<br>UTI*4 | otitis media,<br>omphalitis,<br>pneumonia | otitis media,<br>pneumonia | otitis media               |
| <b>Skin</b>                            | maculopapular and<br>atopic skin lesions                                        | -                                                                       | maculopapular<br>exanthema                                     | -                                                   | -                                                                   | -                                         | -                          | -                          |
| <b>Others</b>                          | hepatosplenomegaly,<br>SJS                                                      | not reported                                                            | hepatosplenomegaly,<br>liver fibrosis/hepatitis                | hypothyroidism,<br>hypocalcemia,<br>hypoalbuminemia | arthralgia, febrile<br>seizures                                     | -                                         | tetany                     | tetany                     |
| <b>Treatment</b>                       |                                                                                 |                                                                         |                                                                |                                                     |                                                                     |                                           |                            |                            |
| <b>Nutrition</b>                       | AA-based formula<br>(n), TPN (p)                                                | AA-based formula<br>(p)                                                 | parenteral (p)                                                 | parenteral (p)                                      | TPN (p)                                                             | -                                         | -                          | -                          |
| <b>Medication</b>                      | Ab (p), AZA (p), CS<br>(p), IFX (p)                                             | Ab (p)                                                                  | CS (g)                                                         |                                                     | 5-ASA(n), Ab (p),<br>AZA (p), CS (p),<br>IFX (p),                   | Ab (p), AF (p)                            | Ab (p), AF (p)             | Ab (p), AF (p), CS<br>(p)  |
| <b>Surgery</b>                         | ileostomy                                                                       | rectovaginal fistula                                                    |                                                                | rectoanal fistula                                   | ileostomy, bowel<br>resection                                       | perianal fistula                          | -                          | -                          |
| <b>Others</b>                          |                                                                                 |                                                                         | HSCT (HLA-identical<br>mother, 1. 12mo, 2.<br>3y2mo)           |                                                     |                                                                     |                                           |                            |                            |
| <b>Outcome</b>                         |                                                                                 |                                                                         |                                                                |                                                     |                                                                     |                                           |                            |                            |
|                                        | died (4y, sepsis)                                                               |                                                                         | died (19y, cGVHD and<br>pulmonary disease)                     | died (2y, sepsis)                                   | alive, stable<br>condition                                          | alive                                     | alive                      | alive                      |

5-ASA, mesalazine; AA, amino acid; Ab, antibiotics; Af, antifungal; AZA, azathioprine; CS, corticosteroids; g, good response; IFX, infliximab; n.r., not reported; LRI: lower respiratory tract infections; n, no response; p, partial response; SJS, Steven's-Johnson syndrome; TPN: total parenteral nutrition; URI: upper respiratory tract infections, UTI: urinary tract infectio

**Table S2. Laboratory findings and immune workup of RIPK1-deficient patients.**

| Patients                                                | P1                | P2                 | P3               | P4               | P5               | P6                | P7                | P8                |
|---------------------------------------------------------|-------------------|--------------------|------------------|------------------|------------------|-------------------|-------------------|-------------------|
| <b>Complete blood counts (10<sup>3</sup> cells/mcl)</b> |                   |                    |                  |                  |                  |                   |                   |                   |
| Hemoglobin [g/dL]                                       | 10.5 (10.5-13)    | 12.1 (10.8-12.6)   | 10.0 (9.0-14.0)  | 11.0             | 10.0 (12.0-16.0) | 9.9 (12-14,5)     | 10,8 (12-14,5)    | 9,2 (12-14)       |
| Platelets                                               | 166 (150-350)     | 426 (234-474)      | 173 (355-666)    | 61               | 831(140-400)     | 176 (150-400)     | 215 (150-450)     | 407 (150-450)     |
| WBCs                                                    | 5.7 (4-20)        | 13.16 (7.05-13.08) | 4.91 (4.7-14.8)  | 3.5              | 20.0 (4-10)      | 4.5 (4.4-9.5)     | 5.7 (5.2-11.0)    | 6.11 (5.2-11.0)   |
| Lymphocytes                                             | 0.456 (1.2-13)    | 10.16 (2.03-5.68)  | 1.180 (3.2-9.8)  | 1.96 (3.9-9.0)   | 6.5 (1.5-4)      | 1.373 (1.9-3.7)   | 1.425 (2.3-5.4)   | 1.41 (2.3-5.4)    |
| Neutrophils                                             | 5.016 (1-10)      | 1.62 (2.34-6.44)   | 3.2 (1.0-9.0)    | 0.6              | 11.4 (2-7.5)     | 2.97 (2.6-6.3)    | 3.962 (2.3-6.4)   | 4.17 (2.3-6.4)    |
| <b>Lymphocyte subsets (10<sup>3</sup> cells/mcl)</b>    |                   |                    |                  |                  |                  |                   |                   |                   |
| CD3                                                     | 1.825 (2.8-5.7)   | 3.67 (1.9-6.2)     | 0.93 (2.3-6.5)   | 0.666 (3.1-4.8)  | n.d.             | 1.009 (1.2-2.6)   | 1.076 (1.4-3.7)   | 0.909 (1.4-3.7)   |
| CD4                                                     | 1.308 (1.8-4.4)   | 2.194 (1.4-4.3)    | 0.62 (1.5-5.0)   | 0.470 (2.2-3.3)  | n.d.             | 0.357 (0.65-1.5)  | 0.591 (0.7-2.2)   | 0.558 (0.7-2.2)   |
| CD8                                                     | 0.549 (0.6-1.5)   | 1.394 (0.5-1.7)    | 0.25 (0.5-1.6)   | 0.157 (1.1-1.7)  | n.d.             | 0.552 (0.37-1.1)  | 0.413 (0.49-1.3)  | 0.313 (0.49-1.3)  |
| CD4:CD8                                                 | 2.4 (1.9-4.2)     | 1.57 (1.3-3.9)     | 2.48             | 3.0 (1.5-2.6)    | 1.0              | 0.68 (1.5-2.9)    | 1.4 (1.5 -2.9)    | 1.78 (1.5-2.9)    |
| CD19                                                    | 1.271 (0.7-2.8)   | 3.1 (0.61-2.6)     | 0.14 (0.6-3.0)   | 0.710 (1.1-1.9)  | n.d.             | 0.144 (0.27-0.86) | 0.228 (0.39-1.4)  | 0.138 (0.39-1.4)  |
| CD16/CD56                                               | 0.09 (0.21-0.8)   | 0.289 (0.16-1.1)   | 0.17 (0.1-1.3)   | 0.57 (0.3-0.7)   | n.d.             | 0.22 (0.1-0.48)   | 0.121 (0.13-0.72) | 0.207 (0.13-0.72) |
| <b>Immunoglobulins</b>                                  |                   |                    |                  |                  |                  |                   |                   |                   |
| IgG [g/L]                                               | 4.93 (1.97-6.71)  | 8.08 (3.0-15.0)    | 6.46 (2.41-6.13) | 6.5 (2.35-4.37)  | 5.08 (7-16)      | 8.53 (6.9-11.5)   | 9,55 (7-11,6)     | 8.28 (7-11.6)     |
| IgM [g/L]                                               | 0.24 (0.21-0.89)  | 1.42 (0.25-1.15)   | 3.06 (0.26-0.6)  | 0.45 (0.34-0.95) | 1.16 (0.4-2.3)   | 0.26 (0.39-0.79)  | 0,89 (0,4-0,9)    | 2.39 (0.4-0.9)    |
| IgA [g/L]                                               | 0.07 (0.065-0.52) | 0.51 (0.16-1.0)    | 0.43 (0.1-0.46)  | 1.5 (0.2-0.62)   | <0.42 (0.7-4.0)  | 0.46 (0.68-1.94)  | 0,91 (0,7-1,6)    | 0.92 (0.7-1.6)    |
| IgE [IU/mL]                                             | 14.57 (0-20)      | 261 (0-30)         | 30 (0-170)       | 22.6 (1-100)     | n.d.             | n.d.              | n.d.              | n.d.              |
| <b>Immune work</b>                                      |                   |                    |                  |                  |                  |                   |                   |                   |
| T cell proliferation                                    | normal            | n.d.               | normal           | normal           | normal           | n.d.              | n.d.              | n.d.              |
| Antibody titers to vaccination                          | normal            | n.d.               | normal           | TT, DT, HI ↓     | normal           | n.d.              | n.d.              | n.d.              |
| NK cell function                                        | not done          | n.d.               | reduced          | n.d.             | n.d.             | n.d.              | n.d.              | n.d.              |
| Complement                                              | normal            | n.d.               | normal           | 0.170 CEA        | elevated c3, c4  | n.d.              | n.d.              | n.d.              |

n.d., not done.

**Table S3. Immunophenotypic characterization of lymphocyte subsets in RIPK1-deficient patients.**

| Population (%)                                                                                    | HD1 | HD2 | HD3 | A.I-1 | A.I-2 | A.II-1 (P1) | HD4 | HD5 | F.I-1 | F.I-2 | F.II-2 (P6) | F.II-3 (P7) | F.II-4 (P8) | HD6 | HD7 | E.I-1 | E.I-2 | E.II-1 | E.II-3 | E.II-2 (P5) |
|---------------------------------------------------------------------------------------------------|-----|-----|-----|-------|-------|-------------|-----|-----|-------|-------|-------------|-------------|-------------|-----|-----|-------|-------|--------|--------|-------------|
| CD3 <sup>+</sup> CD4 <sup>+</sup><br>CCR7 <sup>+</sup> CD45RO <sup>-</sup>                        | 49  | 30  | 29  | 23    | 45    | 90          | 50  | 39  | 24    | 31    | 88          | 77          | 88          | 16  | 34  | 29    | 27    | 64     | 43     | 41          |
| CD3 <sup>+</sup> CD4 <sup>+</sup><br>CCR7 <sup>+</sup> CD45R <sup>+</sup>                         | 31  | 39  | 34  | 34    | 36    | 7           | 26  | 39  | 19    | 31    | 3           | 5           | 4           | 52  | 34  | 49    | 55    | 26     | 44     | 43          |
| CD3 <sup>+</sup> CD4 <sup>+</sup><br>CCR7 <sup>+</sup> CD45RO <sup>+</sup>                        | 15  | 22  | 35  | 35    | 14    | 1           | 19  | 18  | 29    | 32    | 3           | 11          | 3           | 29  | 30  | 20    | 16    | 8      | 12     | 12          |
| CD3 <sup>+</sup> CD4 <sup>+</sup><br>CCR7 <sup>-</sup> CD45RO <sup>-</sup>                        | 1   | 5   | 1   | 3     | 1     | 1           | 3   | 1   | 26    | 4     | 5           | 5           | 4           | 0   | 0   | 0     | 0     | 1      | 0      | 2           |
| CD3 <sup>+</sup> CD8 <sup>+</sup><br>CCR7 <sup>+</sup> CD45RO <sup>-</sup>                        | 40  | 13  | 35  | 5     | 30    | 90          | 65  | 55  | 22    | 32    | 80          | 53          | 83          | 13  | 21  | 31    | 37    | 66     | 64     | 36          |
| CD3 <sup>+</sup> CD8 <sup>+</sup><br>CCR7 <sup>+</sup> CD45R <sup>+</sup>                         | 9   | 7   | 12  | 3     | 8     | 3           | 2   | 5   | 3     | 11    | 1           | 1           | 1           | 14  | 7   | 13    | 17    | 4      | 10     | 3           |
| CD3 <sup>+</sup> CD8 <sup>+</sup><br>CCR7 <sup>+</sup> CD45RO <sup>+</sup>                        | 33  | 36  | 41  | 16    | 52    | 4           | 20  | 24  | 51    | 39    | 6           | 17          | 4           | 58  | 35  | 31    | 38    | 15     | 14     | 33          |
| CD3 <sup>+</sup> CD8 <sup>+</sup><br>CCR7 <sup>-</sup> CD45RO <sup>-</sup>                        | 15  | 40  | 8   | 71    | 8     | 3           | 11  | 14  | 22    | 16    | 13          | 27          | 11          | 13  | 34  | 23    | 7     | 14     | 10     | 26          |
| CD4 <sup>+</sup> CD25 <sup>+</sup> CD127 <sup>lo</sup><br>HLA-DR <sup>-</sup> CD45RO <sup>-</sup> | 42  | 12  | 21  | 11    | 35    | 72          | 37  | 22  | 15    | 14    | 62          | 69          | 80          | 14  | 22  | 11    | 14    | 50     | 56     | 32          |
| CD4 <sup>+</sup> CD25 <sup>+</sup> CD127 <sup>lo</sup><br>HLA-D <sup>-</sup> CD45RO <sup>+</sup>  | 40  | 50  | 55  | 48    | 59    | 21          | 54  | 68  | 79    | 82    | 30          | 28          | 17          | 70  | 70  | 73    | 76    | 42     | 37     | 59          |
| CD4 <sup>+</sup> CD25 <sup>+</sup> CD127 <sup>lo</sup><br>HLA-DR <sup>+</sup> CD45RO <sup>-</sup> | 16  | 35  | 21  | 39    | 0     | 4           | 8   | 8   | 5     | 2     | 4           | 0           | 1           | 13  | 6   | 13    | 7     | 4      | 4      | 4           |
| CD3 <sup>+</sup> CD4 <sup>+</sup><br>CXCR3 <sup>-</sup> CCR6 <sup>-</sup>                         | 56  | 39  | 34  | 31    | 53    | 93          | 62  | 47  | 51    | 52    | 94          | 89          | 92          | 15  | 14  | 22    | 19    | 27     | 11     | 47          |
| CD3 <sup>+</sup> CD4 <sup>+</sup><br>CXCR3 <sup>+</sup> CCR6 <sup>-</sup>                         | 21  | 30  | 29  | 35    | 22    | 4           | 19  | 18  | 29    | 22    | 4           | 9           | 6           | 34  | 38  | 34    | 19    | 26     | 29     | 21          |
| CD3 <sup>+</sup> CD4 <sup>+</sup><br>CXCR3 <sup>+</sup> CCR6 <sup>+</sup>                         | 7   | 14  | 10  | 8     | 10    | 1           | 9   | 10  | 9     | 12    | 1           | 1           | 1           | 20  | 13  | 30    | 22    | 15     | 17     | 14          |
| CD19 <sup>+</sup> CD27 <sup>+</sup> IgD <sup>+</sup>                                              | 80  | 66  | 73  | 72    | 82    | 94          | 51  | 59  | 40    | 24    | 32          | 74          | 69          | 86  | 61  | 53    | 72    | 68     | 81     | 72          |
| CD19 <sup>+</sup> CD27 <sup>+</sup> IgD <sup>+</sup>                                              | 7   | 12  | 11  | 12    | 7     | 3           | 11  | 9   | 7     | 1     | 1           | 1           | 1           | 6   | 20  | 25    | 15    | 14     | 6      | 11          |
| CD19 <sup>+</sup> CD27 <sup>+</sup> IgD <sup>-</sup>                                              | 9   | 18  | 12  | 12    | 9     | 1           | 30  | 27  | 32    | 17    | 4           | 7           | 6           | 7   | 13  | 15    | 9     | 10     | 6      | 10          |

**Table S4. List of primer sequences.**

| <b>Primers</b>              | <b>Sequence (5' - 3')</b>          |
|-----------------------------|------------------------------------|
| <b>sgRNA targets</b>        |                                    |
| sg-Ripk1-T1                 | ATGACATTCAAGGACATGTCTGG            |
| sg-Ripk1-T2                 | TCCTTGTCTTTCAAGCGACGAGG            |
| <b>Genotyping KO clones</b> |                                    |
| gt-RIPK1-KO-T1-F            | TTATGAAGGGCGAAGGGAAGGAAC           |
| gt-RIPK1-KO-T1-R            | AGGCATTCCCTCCTCCTAGTAGAC           |
| gt-RIPK1-KO-T2-F            | TTTCTTTACAGGGTACAGCTCTGCC          |
| gt-RIPK1-KO-T2-R            | GTCTTCACCCATCCTCCTGTTTCC           |
| <b>Sanger Sequencing</b>    |                                    |
| seq-RIPK1-DD-F              | AGCAATTCAGGAAGCTGGAA               |
| seq-RIPK1-DD-R              | CTGAGGCAGCCAACTTTCTG               |
| seq-RIPK1-ex8-F             | AATGTTTCATGACACCCATTCTAATG         |
| seq-RIPK1-ex8-R             | CCACAATCTATAATAGAGCTGC             |
| seq-RIPK1-P4-F              | TGAAATCAGGAAGTGTGAGTCC             |
| seq-RIPK1-P4-R              | TGACTGGTGAGCACACTGTT               |
| <b>Cloning</b>              |                                    |
| cl-RIPK1-P1-F               | CAGATTGATGAAACTGACCATGACTATGAG     |
| cl-RIPK1-P1-R               | GTTTCATCAATCTGAGACTGTGTGAAGCCC     |
| cl-RIPK1-P2/P5-F            | AAGGGAGCCATGGTGGGGAAGCTGGCCCAGGCG  |
| cl-RIPK1-P2/P5-R            | TTCCCCACCATGGCTCCCTTTATGCCTTCC     |
| cl-RIPK1-P3-R               | GCTCGAGTTTATTTTATTCCTAGGTAAAGGTCTT |
| cl-RIPK1-P4-F               | TGCTGTGCAAAAGGG                    |
| cl-RIPK1-P4-R               | AGTTGTGAAGAGAATCAGTCTCTTCAACTT     |
| cl-RIPK1-P6-F               | GCTCGAGTTTATTTTATTCCTAGGCTAGATAGT  |
| cl-RIPK1-P6-R               | TGGTC                              |
| RIPK1_cP_M318IfsTer         | GAAAAACTATGCCCCGTAAACTGGGCTTCAC    |
| RIPK1_cP_1F+KPNI            | TTACGGGCATAGTTTTTCCAGTGCTTTCCC     |
| RIPK1_cP_truncXR+NOTI       | TAAACTATGCGGCCGCCTAGATAGTTGGTCTCAG |
| RIPK1_cP_XR+NOTI            | GCACTGGG                           |
| RIPK1_Mutag-F               | GGGGTACCGCCACCATGCAACCAGACATGTCCT  |
| RIPK1_Mutag-R               | TGAATG                             |
|                             | TAAACTATGCGGCCGCTTAAGGTCTTTGCTGTGC |
|                             | AAAAGGGTC                          |
|                             | TAAACTATGCGGCCGCTTAGTTCTGGCTGACGTA |
|                             | AATCAAGC                           |
|                             | AGTTGTGAAGAGAATCAGTCTCTTCAACTT     |
|                             | AAGTTGAAGAGACTGATTCTCTTCACAACT     |

**Table S5. List of antibodies used for flow cytometry.**

| Antibody (anti-) | Clone  | Cat. No.  | vendor         |
|------------------|--------|-----------|----------------|
| CCR4-PE-Cy7      | L291H4 | 359410    | BioLegend      |
| CCR6-BV786       | 11A9   | 563704    | BD Biosciences |
| CCR6-PE-Cy7      | 11A9   | 560620    | BD Biosciences |
| CCR7-BV421       | 150503 | 562555    | BD Biosciences |
| CD3-APC-H7       | SK7    | 560176    | BD Biosciences |
| CD3-BUV395       | SK7    | 54001     | BD Biosciences |
| CD3-BUV496       | UCHT-1 | 564809    | BD Biosciences |
| CD4-APC          | SK3    | 565994    | BD Biosciences |
| CD4-BB515        | RPA-T4 | 564419    | BD Biosciences |
| CD4-BUV395       | RPA-T4 | 564724    | BD Biosciences |
| CD8-BUV496       | RPA-T8 | 564804    | BD Biosciences |
| CD8-BUV737       | SK1    | 564628    | BD Biosciences |
| CD8-Pacific Blue | RPA-T8 | 558207    | BD Biosciences |
| CD10-BV421       | HI10a  | 562902    | BD Biosciences |
| CD10-PE          | HI10a  | 340921    | BD Biosciences |
| CD11c-BV421      | B-ly6  | 562561    | BD Biosciences |
| CD11c-BV650      | B-ly6  | 563604    | BD Biosciences |
| CD14-APC-Fire780 | M5E2   | 301853    | BioLegend      |
| CD14-BV786       | M5E2   | 563698    | BD Biosciences |
| CD16-APC         | 3G8    | 557758    | BD Biosciences |
| CD19-BUV395      | SJ25C1 | 563549    | BD Biosciences |
| CD19-BV737       | SJ25C1 | 564303    | BD Biosciences |
| CD19-PE          | HD37   | RO80801-2 | Dako           |
| CD19-PerCP Cy5.5 | hib19  | 302230    | BioLegend      |
| CD20-PE-Cy7      | 2H7    | 560735    | BD Biosciences |
| CD21-BUV737      | B-Ly4  | 564437    | BD Biosciences |
| CD21-PE          | B-Ly4  | 555422    | BD Biosciences |
| CD25-PE          | M-A251 | 555432    | BD Biosciences |
| CD27-APC-R700    | M-T271 | 565116    | BD Biosciences |
| CD27-BV786       | L128   | 563327    | BD Biosciences |
| CD28-BB700       | L293   | 745905    | BD Biosciences |
| CD28PerCP-Cy5.5  | CD28.2 | 302922    | BioLegend      |
| CD38-APC         | HB7    | 340439    | BD Biosciences |
| CD38-PE-Cy7      | p67.6  | 333946    | BD Biosciences |
| CD38-BV650       | HB-7   | 356620    | BioLegend      |
| CD45-BV480       | HI30   | 566115    | BD Biosciences |
| CD45-V500        | HI30   | 560777    | BD Biosciences |

|                |            |        |                |
|----------------|------------|--------|----------------|
| CD45RA-APC     | HB7        | 550855 | BD Biosciences |
| CD45RA-BUV737  | HI100      | 564442 | BD Biosciences |
| CD45RA-PE      | HI100      | 555489 | BD Biosciences |
| CD45RO-BB515   | UCHL1      | 564529 | BD Biosciences |
| CD45RO-BV786   | UCHL1      | 564290 | BD Biosciences |
| CD56-PE-CF594  | NCAM16.2   | 562289 | BD Biosciences |
| CD57-BB515     | NK1        | 560845 | BD Biosciences |
| CD57-FITC      | NK-1       | 555619 | BD Biosciences |
| CD62L-BV650    | DREG-56    | 563808 | BD Biosciences |
| CD69-APC-Cy7   | FN50       | 310914 | BioLegend      |
| CD123-BV421    | 9N5        | 562517 | BD Biosciences |
| CD123-BV786    | 7G3        | 564196 | BD Biosciences |
| CD127-APC      | A019D5     | 351316 | BioLegend      |
| CD127-BUV737   | HIL-7R-M21 | 564300 | BD Biosciences |
| CXCR3-BV421    | 1C6        | 562558 | BD Biosciences |
| CXCR3-PE-CF594 | 1C6/CXCR3  | 562451 | BD Biosciences |
| HLA-DR BV711   | G46-6      | 563696 | BD Biosciences |
| HLA-DR PE      | L243       | 307606 | BioLegend      |
| HLA-DR-PE-Cy7  | G46-6      | 560651 | BD Biosciences |
| IgD-BB515      | IA6-2      | 560651 | BD Biosciences |
| IgM-BV421      | g20-127    | 562618 | BD Biosciences |

**Table S6. List of antibodies used for western blot analysis or EMSA.**

| Antibody (anti-)                                | Cat. No.       | Vendor             |
|-------------------------------------------------|----------------|--------------------|
| beta-Actin-HRP                                  | SC-47778       | Santa Cruz         |
| Caspase-1                                       | BML-SA101-0100 | Enzo Life Sciences |
| IL-1 beta/IL-1F2                                | AF-201-NA      | R&D Systems        |
| MLKL (EPR17514)                                 | AB184718       | Abcam              |
| NFκB-p50/p105                                   | Sc-114X        | Santa Cruz         |
| NFκB-p65                                        | 8242           | CST                |
| NLRP3 (D2P5E)                                   | 13158          | CST                |
| phospho-NFκB-P65 (Ser536)                       | 3033           | CST                |
| phospho-p44/42 MAPK (Erk1/2)<br>(Thr202/Tyr204) | 4370           | CST                |
| RIPK1 (D94C12)                                  | 3493           | CST                |
| Vinculin                                        | V9131          | Sigma-Aldrich      |

**Table S7. List of antibodies used for confocal microscopy analysis.**

| Antibody (anti-)                               | Cat. No. | Vendor                   |
|------------------------------------------------|----------|--------------------------|
| Goat anti-Rabbit IgG (H+L),<br>Alexa Fluor 488 | A27034   | Thermo Fisher Scientific |
| Phalloidin, Alexa Fluor 594                    | A12381   | Thermo Fisher Scientific |
| RIPK1 (D94C12)                                 | 3493     | CST                      |

## References

1. Kotlarz D, et al. (2018) Human TGF-beta1 deficiency causes severe inflammatory bowel disease and encephalopathy. *Nat Genet* 50(3):344-348.
2. Field MA, Cho V, Andrews TD, & Goodnow CC (2015) Reliably Detecting Clinically Important Variants Requires Both Combined Variant Calls and Optimized Filtering Strategies. *PLoS One* 10(11):e0143199.
3. Gaidt MM, et al. (2016) Human Monocytes Engage an Alternative Inflammasome Pathway. *Immunity* 44(4):833-846.
4. Maier HJ, Marienfeld R, Wirth T, & Baumann B (2003) Critical role of RelB serine 368 for dimerization and p100 stabilization. *J Biol Chem* 278(40):39242-39250.
5. Ting AT, Pimentel-Muinos FX, & Seed B (1996) RIP mediates tumor necrosis factor receptor 1 activation of NF-kappaB but not Fas/APO-1-initiated apoptosis. *EMBO J* 15(22):6189-6196.
